# Supplementary material
Source: PubMed Central journal article supplement (PMC7165044)
Supplement: NIHMS1546326-supplement-10456_2019_9701_MOESM2_ESM.pdf [file NIHMS1546326-supplement-10456_2019_9701_MOESM2_ESM.pdf]

## Supplementary Material

Teresa L. Capasso<sup>1</sup>, Bijun Li<sup>1</sup>, Harry J. Volek<sup>2</sup>, Waqas Khalid<sup>2</sup>, Elizabeth R. Rochon<sup>1,3</sup>, Arulselvi Anbalagan<sup>1</sup>, Chelsea Herdman<sup>4</sup>, H. Joseph Yost<sup>4</sup>, Flordeliza S. Villanueva<sup>3,5</sup>, Kang Kim<sup>2,3,5</sup>, Beth L. Roman<sup>1,3</sup>

<sup>1</sup>Department of Human Genetics, Graduate School of Public Health, University of Pittsburgh, Pittsburgh, PA 15261

<sup>2</sup>Department of Bioengineering, Swanson School of Engineering, University of Pittsburgh, Pittsburgh, PA 15260

<sup>3</sup>Heart, Lung, Blood and Vascular Medicine Institute, University of Pittsburgh, Pittsburgh, PA 15261

<sup>4</sup>Molecular Medicine Program, University of Utah, Salt Lake City, UT 84112

<sup>5</sup>Center for Ultrasound Molecular Imaging and Therapeutics, Division of Cardiology, Department of Medicine, School of Medicine, University of Pittsburgh, Pittsburgh, PA 15261

Corresponding author: Beth L. Roman, [romanb@pitt.edu](mailto:romanb@pitt.edu), 412.624.7006.

ORCID 0000-0002-1250-1705

Supplementary Material

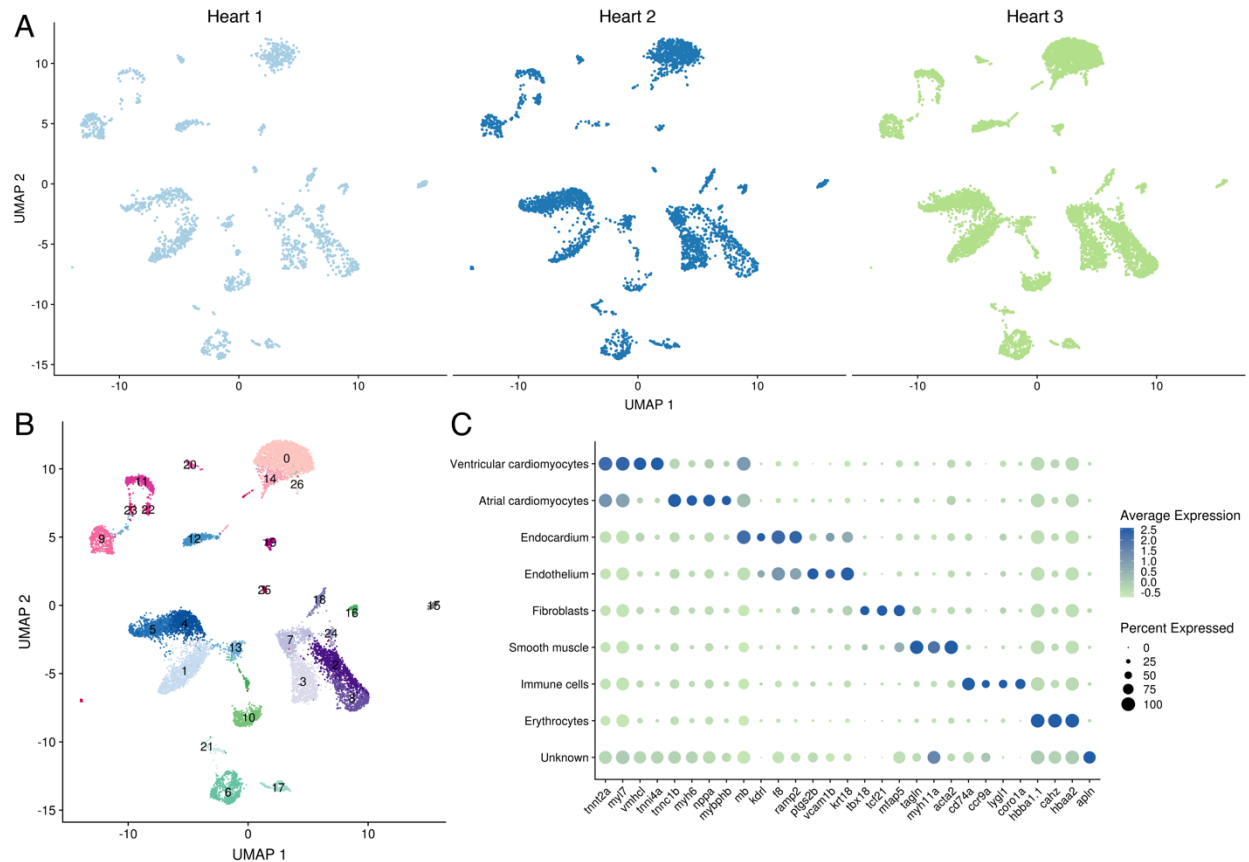

**Supplementary Fig. 1 a** UMAP plots of individual hearts (Heart 1 = 2086 cells, Heart 2 = 3924 cells, Heart 3 = 8462 cells). **b** UMAP plot of the three integrated heart datasets. Cluster numbers correspond to the original cluster IDs from the FindClusters function (res 0.8) and colors correspond to cell type as annotated in Supplementary Dataset 1. Cluster identities are as follows: 0, erythrocytes; 1, atrial cardiomyocytes; 2, endothelium; 3, endocardium; 4, ventricular cardiomyocytes; 5, ventricular cardiomyocytes; 6, fibroblasts; 7, endocardium; 8, endothelium; 9, immune cells; 10, smooth muscle; 11, immune cells; 12, atrial cardiomyocytes; 13, atrial cardiomyocytes; 14, erythrocytes; 15, unknown; 16, smooth muscle; 17, fibroblasts; 18, endothelium; 19, immune cells; 20, immune cells; 21, fibroblasts; 22, immune cells; 23, immune cells; 24, endothelium; 25, immune cells; 26, erythrocytes. **c** Dotplot demonstrating the scaled expression values of select genes used to characterize the clusters. The size of each dot represents the percentage of cells within the cluster that express the gene.

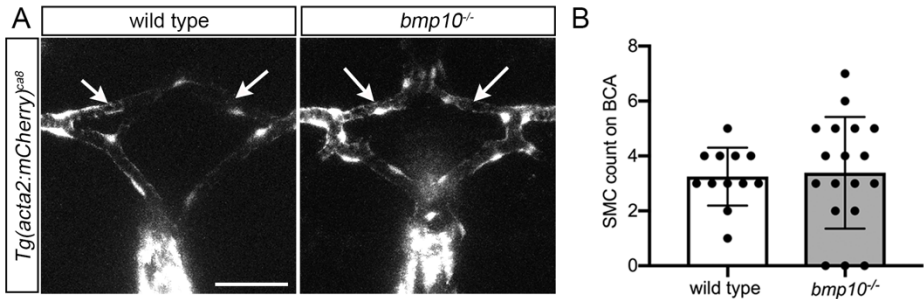

**Supplementary Fig. 2** *bmp10* mutant embryos have normal smooth muscle cell coverage on the basal communicating artery (BCA) at 5 dpf. **a** Cranial vasculature in *bmp10*<sup>pt527</sup>;*Tg(acta2:mcherry)<sup>ca8</sup>* mutant and wild type siblings at 5 dpf. Arrows, BCA. 2D confocal projections, dorsal views, anterior top. Scale bar: 50  $\mu$ m. **b** Quantification of smooth cell number on BCA. N= 12 wild types, 18 mutants over 3 experiments. Bars shown mean  $\pm$  SD. Not significant by unpaired Student's *t* test.

Supplementary Material

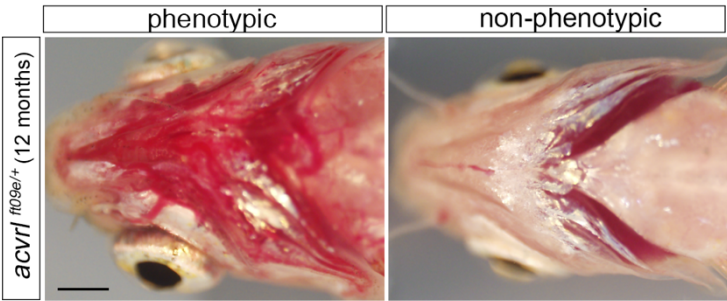

**Supplementary Fig. 3** *acvr1*<sup>ft09e/+</sup> fish phenocopy *bmp10* mutants with low penetrance. 12-month fish. Scale bar: 1 mm.

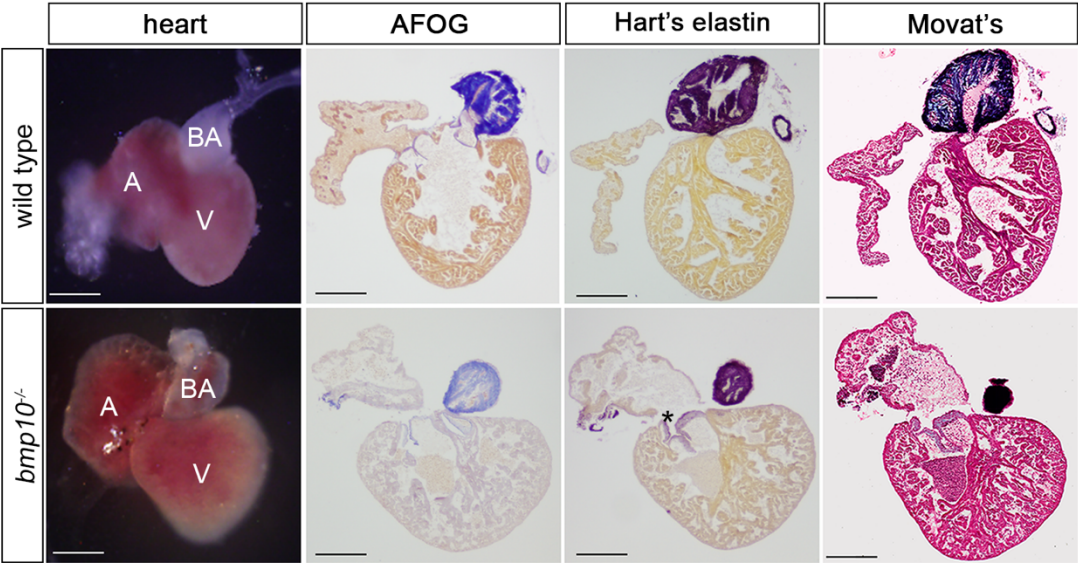

**Supplementary Fig. 4** *bmp10* mutants have abnormally shaped hearts at 3 months. Hearts from 3-month wild type and *bmp10*<sup>pt527</sup> mutant siblings, whole mount or sections stained with acid fuchsin orange G (AFOG) for collagen (blue) and fibrin (red); Hart's elastin (purple); or Movat's pentachrome for muscle (red), collagen (yellow), elastin (blue-black), and ground substance (light blue). A, atrium; V, ventricle; BA, bulbus arteriosus; asterisks, valves. Scale bars, 200 μm. Images representative of N = 6 hearts per genotype from 3 independent lines.

Supplementary Table 1: TALENs and gRNAs

| Gene              | TALEN (Addgene #)                   | Target sequence (5'-3')                               |
|-------------------|-------------------------------------|-------------------------------------------------------|
| <i>bmp9/gdf2</i>  | TAL3010 (36002)<br>TAL3011 (36003)  | TTGAACAAGGTGGAGAGTtcttaggctttatgaAGGAAGATTTTTTGAGGA   |
| <i>bmp10</i>      | TAL3032 (41206)<br>TAL 3033 (41207) | TCAGCTCCCCGGAGAGGCaccgcactgctocagggTTGGATGATGGACATGGA |
| Gene              | gRNA name                           | Target sequence                                       |
| <i>bmp10-like</i> | gRNA <i>bmp10l.3</i>                | AGTGGAGGACTGCAGAATAG                                  |

Supplementary table 2: Genotyping assays

| Gene              | Allele  | Forward primer                  | Reverse primer                | Enzyme | Result                            |
|-------------------|---------|---------------------------------|-------------------------------|--------|-----------------------------------|
| <i>bmp9</i>       | pt533   | CACTTAAGGAACCC<br>CGATTTTC      | ACTCACCCCTGAAC<br>GACAAAGC    | Ddel   | WT 80+95+255<br>bp<br>M 95+327 bp |
| <i>bmp9</i>       | pt536   | CACTTAAGGAACCC<br>CGATTTTC      | ACTCACCCCTGAAC<br>GACAAAGC    | Ddel   | WT 80+95+255<br>bp<br>M 95+328 bp |
| <i>bmp10</i>      | pt527   | CAAAGTAGCCCCAT<br>CAGCTC        | CTTCAGGGTCTCC<br>ATCAAGC      | NA     | WT 138 bp<br>M 130 bp*            |
| <i>bmp10</i>      | pt543   | CAAAGTAGCCCCAT<br>CAGCTC        | CTTCAGGGTCTCC<br>ATCAAGC      | BstNI  | WT 44+94 bp<br>M 131 bp           |
| <i>bmp10-like</i> | pt544   | GAGTTCGGCGCAGC<br>GCTAAAGTGAAG  | TGGGGACTCTTCA<br>GATTGAGCAGCG | MbolI  | WT 208 bp<br>M 155+35 bp          |
| <i>bmp10-like</i> | pt545   | CGCAGCGCTAAAGT<br>GGAGGACTGCTGA | TGGGGACTCTTCA<br>GATTGAGCAGCG | Ddel   | WT 200 bp<br>M 168+24 bp          |
| <i>bmp10-like</i> | sa11654 | CAGAACTGCGCATT<br>CACATGTTTC    | GATGCCGACTTTT<br>CTCCAGTCTC   | Ddel   | WT 197 bp<br>M 176+21 bp          |

\*Separation requires high-resolution gel e.g. 4% Metaphor agarose (Lonza, Walkersville MD USA).

**Supplementary Table 3: PCR primers**

| <b>Gene</b>       | <b>Forward primer</b>     | <b>Reverse primer</b>      |
|-------------------|---------------------------|----------------------------|
| <i>bmp9</i>       | CGCAGGAACACAGAAAGGTT      | GTTGGGTTTTGTTGCCTTGT       |
| <i>bmp10</i>      | ATGCCTTCGGCAAACATCATAACGC | TTGAAGAGAAGTGGGTGTCGTCTCAC |
| <i>bmp10-like</i> | GGCAGCTAACATCATCAGGAGCTTC | AGATGTTGAACTGGAGACGCTGC    |
| <i>acvr1</i>      | GGGTCTCGTCTTGTGGGAGA      | GTCAGAGGGCACCATGTCAA       |
| <i>actb2</i>      | CGTGCTGTCTTCCCATCCA       | TCACCAACGTAGCTGTCTTTCTG    |

**Supplementary Table 4: Primers used to generate templates for riboprobes**

| <b>Gene</b>   | <b>Forward primer</b>                          | <b>Reverse primer (with T7 site)</b>                |
|---------------|------------------------------------------------|-----------------------------------------------------|
| <i>ltbp3</i>  | CCTGGGGCCAAAATAAATGCTACA                       | TAATACGACTCACTATAGGGAGAAATGGG<br>GACTTCCGGAGGCTTGAC |
| <i>nkx2.5</i> | CATTAACCCTCACTAAAGGGAAGTG<br>CGGGACATACTGAACCT | TAATACGACTCACTATAGGGTGCCTCTTG<br>CACTTGTATCG        |
| <i>tbx20</i>  | AGCCGCTCATCCCGACGACTC                          | TAATACGACTCACTATAGGGAGAGACGCG<br>GTGTGATCTTTCTTCTTG |
